# Supplementary material
Source: Springer Nature journal article supplement (https://www.springermedizin.de/resource/supplementary/12889_2013_6583_MOESM5_ESM.pdf/9498608)

● Large aggregate    △ Small aggregate    ☆ Cut off    H Hospital    + Health Centre

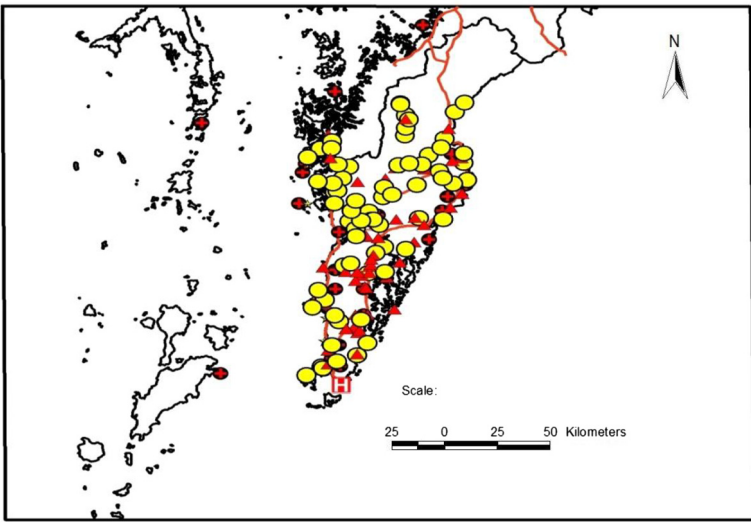

Supplement: MOESM5 [file 9498608]
